# Supplementary material for: Flexible transfer of plasmonic photonic structures onto fiber tips for sensor applications in liquids
Source: Royal Society of Chemistry journal article supplement (doi:10.1039/c8nr05871g), 2018-01-01
Supplement: c8nr05871g1.pdf [file c8nr05871g1.pdf]

## **Flexible transfer of plasmonic photonic structures onto fiber tips for sensor applications in liquids**

Yan Wang<sup>1</sup>, Feifei Liu<sup>1,2</sup>, and Xinping Zhang<sup>1,\*</sup>

<sup>1</sup>*Institute of Information Photonics Technology and College of Applied Sciences, Beijing  
University of Technology, Beijing 100124, P. R. China*

<sup>2</sup>*State Key Laboratory of Surface Physics and Department of Physics, Fudan University,  
Shanghai 200433, P. R. China*

\*Email: [zhangxinping@bjut.edu.cn](mailto:zhangxinping@bjut.edu.cn)

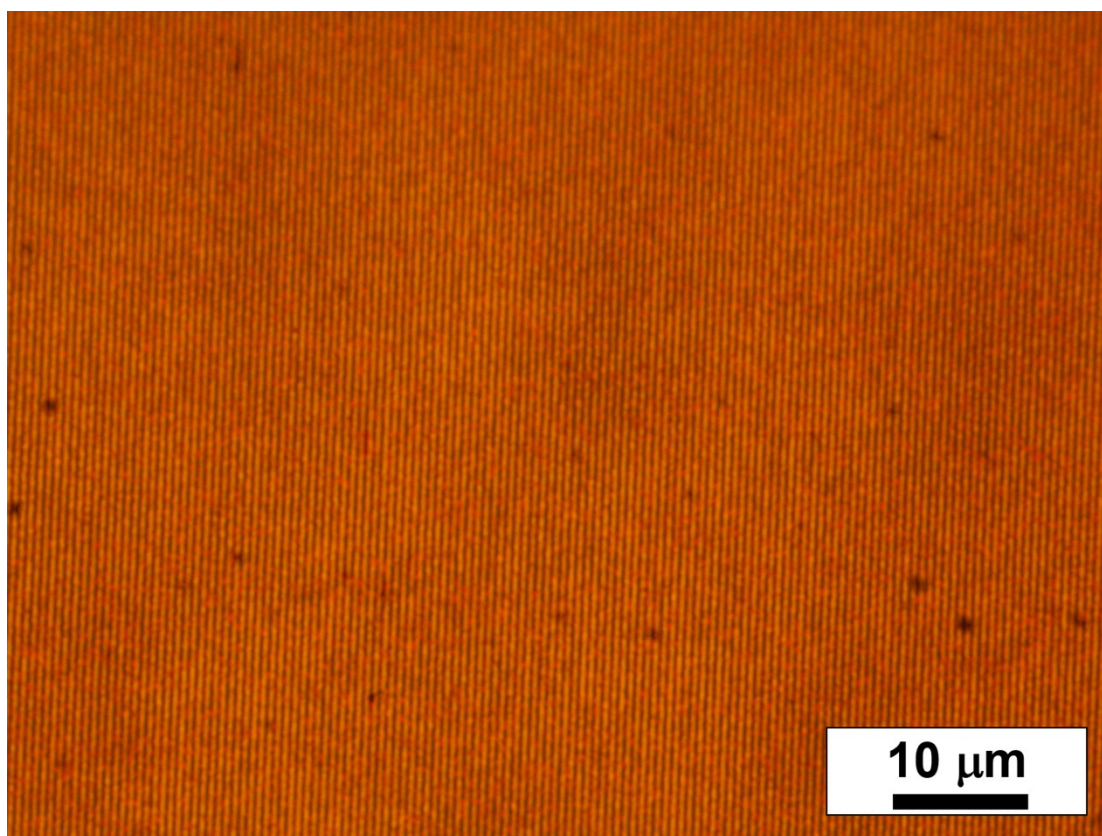

Fig. S1 Observation of the gold nanograting structures in Fig. 2(b) under the optical microscope.

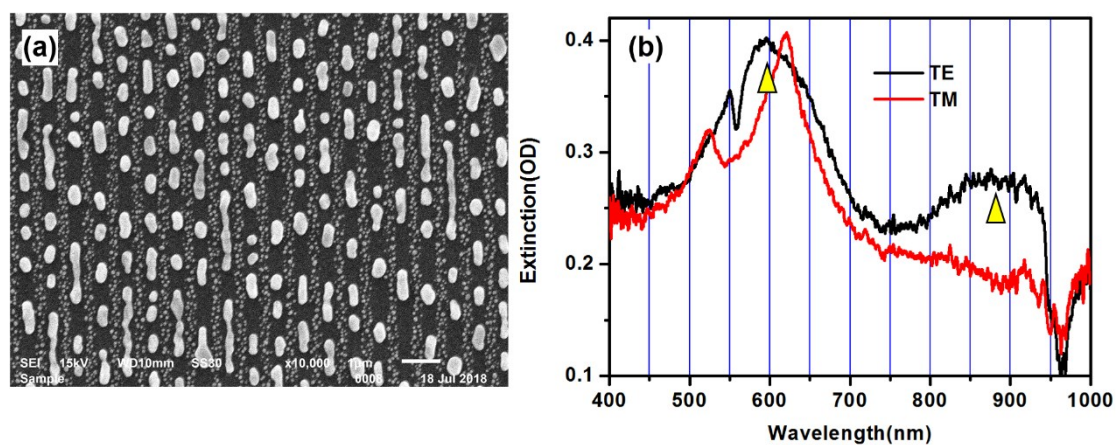

Fig. S2 (a) SEM image of a gold nanoparticle grating with a period of 600 nm. (b) Transmissive optical extinction spectra measured on the sample in (a) for TE (black) and TM (red) polarizations.
